# Supplementary material
Source: Springer Nature journal article supplement (https://www.springermedizin.de/resource/supplementary/12876_2012_797_MOESM1_ESM.pdf/9437716)

Flow chart illustrating the study progress from initial enrollment, through randomization, to primary endpoint assessment.

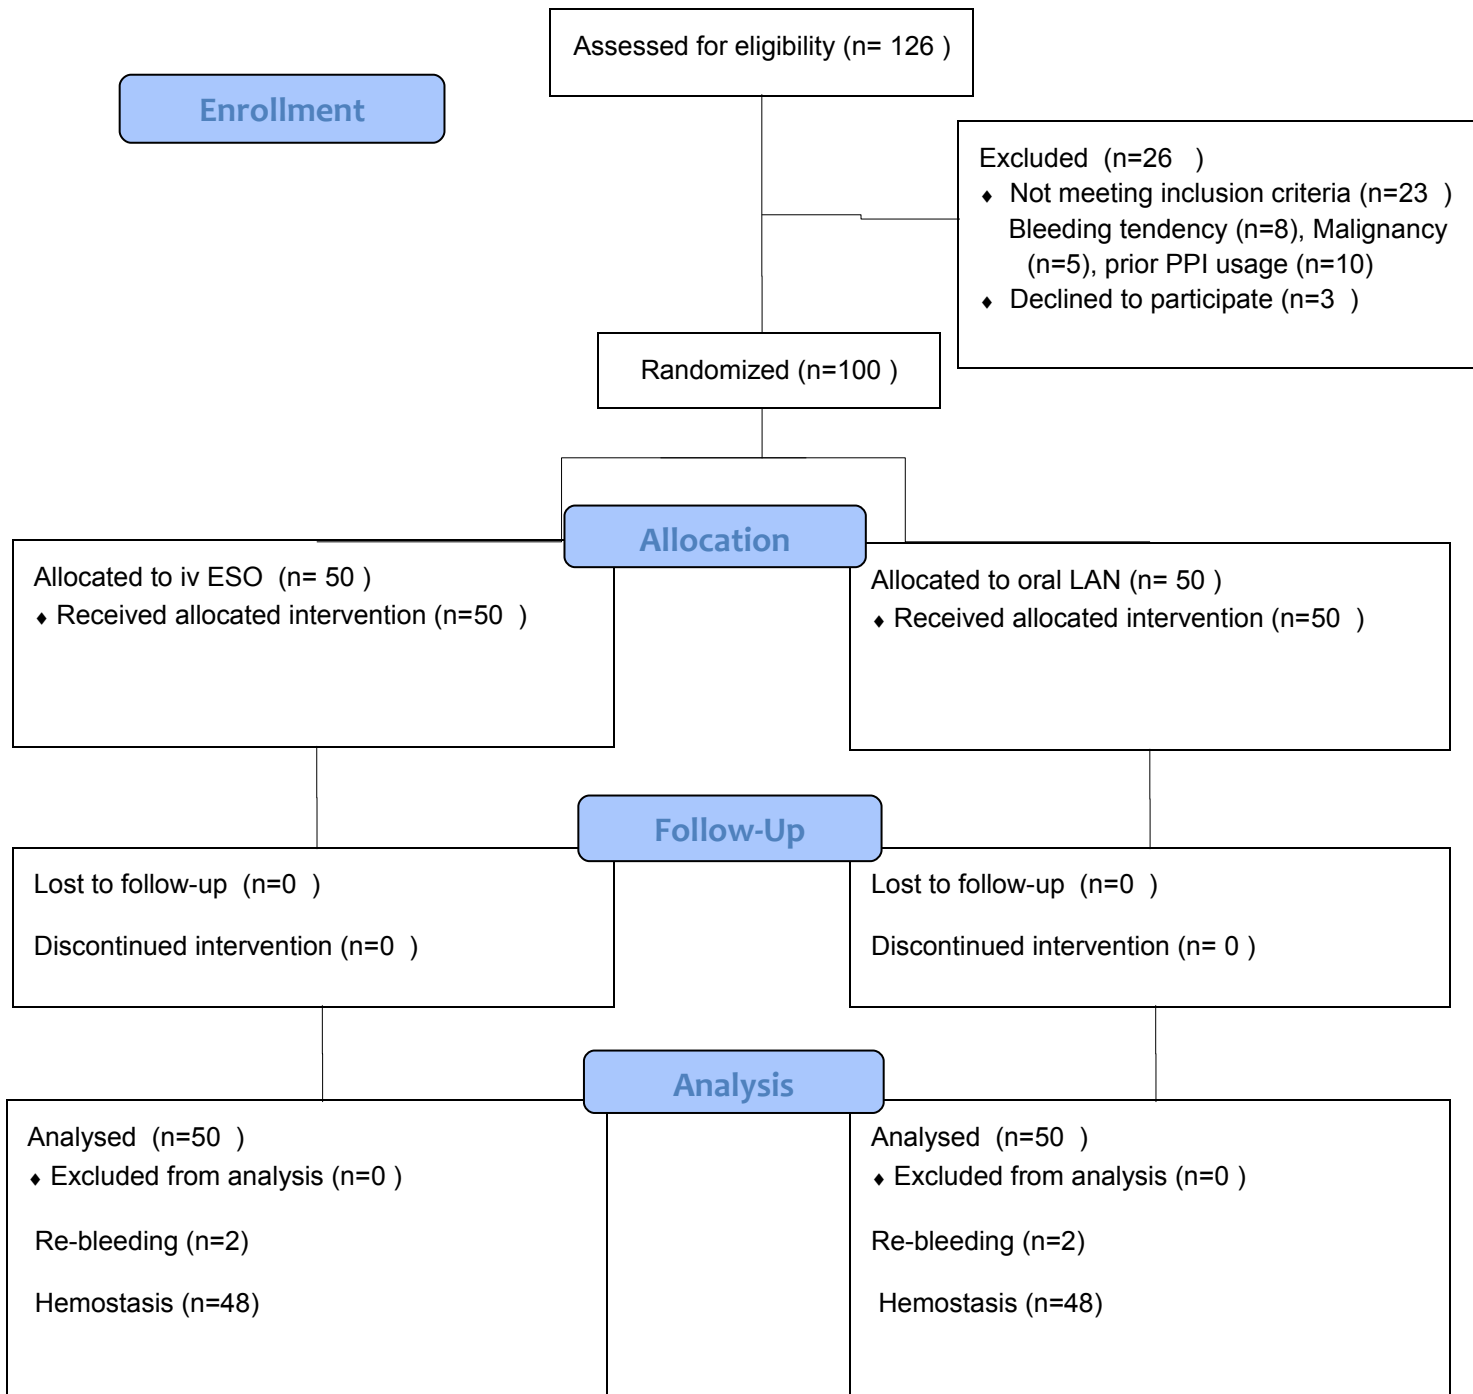

Supplement: MOESM1 [file 9437716]
